# Supplementary material
Source: publisher site journal article supplement (https://www.dovepress.com/get_supplementary_file.php?f=supplementary_file_68909_3.pdf)
Supplement: Supplementary file 1 [file get_supplementary_file.php]

Table S3. Melting point, CLogP, KLog P, and estimated in silico solubility parameters for 185 drugs.

| Drug                    | reference literature solubility, mg/mL | maximum dose strength (mg) | melting point, °C (Merck Index) | molecular weight | CLogP (BioLoom 5.0) | in silico solubility (mg/mL) based on CLogP (BioLoom 5.0) and experimental melting point | lowest solubility, CLogP (BioLoom 5.0) and experimental melting point | in silico dose number, CLogP (BioLoom 5.0) and experimental melting point | in silico solubility (mg/mL) based on CLogP (BioLoom 5.0) and average melting point | lowest solubility, CLogP (BioLoom 5.0) and average melting point | in silico dose number, CLogP (BioLoom 5.0) and average melting point | KLogP |
|-------------------------|----------------------------------------|----------------------------|---------------------------------|------------------|---------------------|------------------------------------------------------------------------------------------|-----------------------------------------------------------------------|---------------------------------------------------------------------------|-------------------------------------------------------------------------------------|------------------------------------------------------------------|----------------------------------------------------------------------|-------|
| abacavir sulfate        | 22.9                                   | 300                        | 165                             | 286.33           | 0.81                | 11.57                                                                                    | 10                                                                    | 0.12                                                                      | 12.1937378                                                                          | 10                                                               | 0.12                                                                 | 0.99  |
| aceclofenac             | 0.01                                   | 100                        | 149.5                           | 354.19           | 4.74                | 0                                                                                        | 0.01                                                                  | 40                                                                        | 0.00177217                                                                          | 0.01                                                             | 40                                                                   | 3.05  |
| acetaminophen           | 0.1                                    | 1000                       | 169.7                           | 151.16           | 0.49                | 11.47                                                                                    | 10                                                                    | 0.4                                                                       | 13.449523                                                                           | 10                                                               | 0.4                                                                  | 0.7   |
| acyclovir               | 1                                      | 800                        | 256.7                           | 225.2            | -2.42               | 1910.9                                                                                   | 1000                                                                  | 0                                                                         | 16286.8984                                                                          | 1000                                                             | 0.0032                                                               | -1.03 |
| albendazole             | 0.01                                   | 400                        | 209                             | 265.34           | 3.46                | 0.01                                                                                     | 0.01                                                                  | 160                                                                       | 0.02529722                                                                          | 0.01                                                             | 160                                                                  | 1.06  |
| alibendol               | 10                                     | 100                        | 95                              | 251.28           | 1.81                | 5.01                                                                                     | 1                                                                     | 0.4                                                                       | 1.07010877                                                                          | 1                                                                | 0.4                                                                  | 0.98  |
| alprazolam              | 0.01                                   | 2                          | 228.2                           | 308.77           | 2.55                | 0.05                                                                                     | 0.01                                                                  | 0.8                                                                       | 0.23927928                                                                          | 0.1                                                              | 0.08                                                                 | 3.5   |
| amiloride hydrochloride | 1                                      | 5                          | 241                             | 229.63           | 0.11                | 8.22                                                                                     | 1                                                                     | 0.02                                                                      | 49.0115713                                                                          | 33                                                               | 0.00060606                                                           | -0.58 |
| anastrozole             | 0.1                                    | 1                          | 81.5                            | 293.37           | 1.48                | 17                                                                                       | 10                                                                    | 0                                                                         | 2.67107265                                                                          | 1                                                                | 0.004                                                                | 2.44  |
| atenolol                | 1                                      | 100                        | 147                             | 266.34           | -0.11               | 134.94                                                                                   | 100                                                                   | 0                                                                         | 94.342286                                                                           | 33                                                               | 0.01212121                                                           | 1.33  |
| atropine sulfate        | 1                                      | 1                          | 115                             | 289.37           | 1.3                 | 11.83                                                                                    | 10                                                                    | 0                                                                         | 3.98770942                                                                          | 1                                                                | 0.004                                                                | 2.38  |

|                          |       |      |       |        |       |          |      |      |            |      |       |      |
|--------------------------|-------|------|-------|--------|-------|----------|------|------|------------|------|-------|------|
| azithromycin hydrate     | 0.01  | 600  | 114   | 748.98 | 2.64  | 1.43     | 1    | 2.4  | 0.47178075 | 0.1  | 24    | 2.88 |
| azulene sulfonate sodium | 10    | 2    | 44.7  | 128.17 | 3.32  | 0.25     | 0.1  | 0.08 | 0.01686772 | 0.01 | 0.8   | 2.42 |
| benazepril hydrochloride | 33    | 40   | 148.5 | 424.49 | 1.82  | 2.44     | 1    | 0.16 | 1.7665969  | 1    | 0.16  | 2.85 |
| benznidazole             | 0.4   | 100  | 188.7 | 260.25 | 0.9   | 4.98     | 1    | 0.4  | 9.00867124 | 10   | 0.04  | 0.26 |
| bicalutamide             | 0.005 | 150  | 192   | 430.38 | 2.71  | 0.12     | 0.1  | 6    | 0.23073957 | 0.1  | 6     | 1.76 |
| biperiden hydrochloride  | 0.01  | 2    | 101   | 311.46 | 4.94  | 0        | 0.01 | 0.8  | 0.00098327 | 0.01 | 0.8   | 4.23 |
| bisacodyl                | 0.01  | 5    | 138   | 361.39 | 2.85  | 0.25     | 0.1  | 0.2  | 0.1403609  | 0.1  | 0.2   | 3.18 |
| brotizolam               | 0.01  | 0.25 | 213   | 393.7  | 2.71  | 0.07     | 0.01 | 0.1  | 0.21107433 | 0.1  | 0.01  | 2.79 |
| cabergoline              | 0.01  | 4    | 103   | 451.6  | 4.17  | 0.03     | 0.01 | 1.6  | 0.00839506 | 0.01 | 1.6   | 3.7  |
| candesartan cilexetil    | 0.01  | 16   | 184   | 440.45 | 7.08  | 0        | 0.01 | 6.4  | 1.0073E-05 | 0.01 | 6.4   | 2.54 |
| capecitabine             | 26    | 500  | 115.5 | 359.35 | -2.73 | 155620.8 | 1000 | 0    | 53062.4929 | 1000 | 0.002 | -0.2 |
| captopril                | 10    | 25   | 103.5 | 217.29 | 0.89  | 29.67    | 10   | 0.01 | 7.69679182 | 1    | 0.1   | 0.5  |
| carbamazepine            | 0.01  | 400  | 191.5 | 236.27 | 2.38  | 0.14     | 0.1  | 16   | 0.27081866 | 0.1  | 16    | 2.54 |
| carvedilol               | 0.01  | 25   | 114.5 | 406.47 | 4.04  | 0.03     | 0.01 | 10   | 0.01019292 | 0.01 | 10    | 3.32 |
| celecoxib                | 0.01  | 400  | 158   | 381.38 | 4.37  | 0        | 0.01 | 160  | 0.0044733  | 0.01 | 160   | 1.99 |

|                          |      |     |       |         |       |        |      |      |            |      |        |      |
|--------------------------|------|-----|-------|---------|-------|--------|------|------|------------|------|--------|------|
| cetirizine hydrochloride | 33   | 10  | 112.5 | 388.9   | 2.08  | 2.79   | 1    | 0.04 | 0.88942215 | 0.1  | 0.4    | 3.69 |
| chloramphenicol          | 1    | 250 | 151   | 323.13  | 1.28  | 6.09   | 1    | 1    | 4.66280529 | 1    | 1      | 1.05 |
| chloroquine phosphate    | 0.1  | 150 | 87    | 319.88  | 5.06  | 0      | 0.01 | 60   | 0.00076605 | 0.01 | 60     | 3.98 |
| cilazapril               | 5    | 2.5 | 96    | 417.5   | 1.47  | 17.79  | 10   | 0    | 3.8897929  | 1    | 0.01   | 2.03 |
| cilostazol               | 0.01 | 100 | 159.9 | 369.46  | 3.53  | 0.03   | 0.01 | 40   | 0.0299804  | 0.01 | 40     | 2.28 |
| cimetidine               | 1    | 200 | 142   | 252.35  | 0.38  | 46.37  | 33   | 0.02 | 28.9249961 | 10   | 0.08   | 0.51 |
| clarithromycin           | 0.01 | 500 | 223.5 | 747.95  | 2.37  | 0.22   | 0.1  | 20   | 0.87728876 | 0.1  | 20     | 2.76 |
| clofazimine              | 0.01 | 100 | 211   | 473.41  | 7.7   | 0      | 0.01 | 40   | 2.5972E-06 | 0.01 | 40     | 6.56 |
| clonidine hydrochloride  | 33   | 0.3 | 130   | 230.1   | 1.43  | 4.95   | 1    | 0    | 2.35064269 | 1    | 0.0012 | 2.52 |
| clozapine                | 0.01 | 100 | 183.5 | 326.83  | 3.71  | 0.01   | 0.01 | 40   | 0.01752233 | 0.01 | 40     | 3.71 |
| codeine phosphate        | 1    | 30  | 155   | 299.36  | 0.98  | 10.27  | 10   | 0.01 | 8.61913673 | 1    | 0.12   | 2.64 |
| cyclophosphamide         | 33   | 25  | 43    | 261.1   | 0.8   | 174.22 | 100  | 0    | 11.3782867 | 10   | 0.01   | 0.63 |
| cyclosporin a            | 0.01 | 100 | 149.5 | 1202.61 | 14.36 | 0      | 0.01 | 40   | 1.4434E-12 | 0.01 | 40     | 5.71 |
| cyproterone acetate      | 0.01 | 100 | 238.7 | 374.91  | 3.42  | 0.01   | 0.01 | 40   | 0.03919196 | 0.01 | 40     | 4.56 |
| dapsone                  | 0.01 | 100 | 175.5 | 248.31  | 0.89  | 6.57   | 1    | 0.4  | 8.79557447 | 1    | 0.4    | 1.39 |
| desloratadine            | 1    | 5   | 150.5 | 310.83  | 3.83  | 0.02   | 0.01 | 2    | 0.01264133 | 0.01 | 2      | 4.59 |

|                                 |      |     |       |        |       |         |      |      |            |      |        |       |
|---------------------------------|------|-----|-------|--------|-------|---------|------|------|------------|------|--------|-------|
| dexamethasone                   | 0.01 | 0.5 | 263   | 392.46 | 1.79  | 0.18    | 0.1  | 0.02 | 1.75011021 | 1    | 0.002  | 2.65  |
| diazepam                        | 0.01 | 5   | 125.5 | 284.75 | 2.96  | 0.2     | 0.1  | 0.2  | 0.0858487  | 0.01 | 2      | 3.43  |
| diclofenac sodium               | 0.1  | 25  | 157   | 296.15 | 4.73  | 0       | 0.01 | 10   | 0.00151629 | 0.01 | 10     | 3.47  |
| didanosine                      | 10   | 200 | 161.5 | 236.23 | -1.92 | 5552.46 | 1000 | 0    | 5402.62781 | 1000 | 0.0008 | -0.49 |
| diethylcarbamazine citrate      | 750  | 100 | 48    | 199.29 | 1.62  | 17.96   | 10   | 0.04 | 1.31448461 | 1    | 0.4    | 0.94  |
| diloxanide furoate              | 0.1  | 500 | 175   | 234.08 | 1.77  | 0.83    | 0.1  | 20   | 1.0930356  | 1    | 2      | 2.25  |
| domperidone maleate             | 0.1  | 10  | 242.5 | 425.92 | 4.27  | 0       | 0.01 | 4    | 0.00628924 | 0.01 | 4      | 3.44  |
| doxifluridine                   | 33   | 200 | 189.5 | 246.19 | -1.19 | 569.14  | 100  | 0.01 | 1048.43234 | 1000 | 0.0008 | -0.84 |
| efavirenz                       | 0.01 | 600 | 140   | 315.68 | 3.73  | 0.03    | 0.01 | 240  | 0.01616282 | 0.01 | 240    | 2.27  |
| epalrestat                      | 0.01 | 50  | 213.5 | 319.4  | 2.43  | 0.1     | 0.1  | 2    | 0.32629086 | 0.1  | 2      | 2.04  |
| epinastine hydrochloride        | 100  | 20  | 206.5 | 249.31 | 3.01  | 0.02    | 0.01 | 8    | 0.06698996 | 0.01 | 8      | 2.9   |
| eprosartan mesylate             | 0.01 | 600 | 260.5 | 424.52 | 4.8   | 0       | 0.01 | 240  | 0.00184998 | 0.01 | 240    | 3.12  |
| ergometrine(ergonovine) maleate | 1    | 0.2 | 162   | 325.4  | 1.23  | 5.35    | 1    | 0    | 5.26850684 | 1    | 0.0008 | 2.69  |

|                            |      |     |       |        |       |        |      |       |            |      |            |       |
|----------------------------|------|-----|-------|--------|-------|--------|------|-------|------------|------|------------|-------|
| erythromycin               | 0.01 | 250 | 137.5 | 733.92 | 1.61  | 8.8    | 1    | 1     | 4.95357477 | 1    | 1          | 2.53  |
| ethylsuccinate             |      |     |       |        |       |        |      |       |            |      |            |       |
| ethambutol hydrochloride   | 10   | 400 | 88.1  | 204.31 | 0.12  | 233.4  | 100  | 0.02  | 42.6147185 | 33   | 0.04848485 | 0.55  |
| ethinyl estradiol          | 0.01 | 1   | 143.5 | 296.4  | 3.86  | 0.02   | 0.01 | 0.4   | 0.01124989 | 0.01 | 0.4        | 3.88  |
| ethosuximide               | 100  | 250 | 64.5  | 141.17 | 0.39  | 148.32 | 100  | 0.01  | 15.8129324 | 10   | 0.1        | 0.44  |
| etizolam                   | 0.01 | 1   | 147.5 | 342.85 | 2.87  | 0.18   | 0.1  | 0.04  | 0.12716692 | 0.1  | 0.04       | 3.53  |
| ezetimibe                  | 0.01 | 10  | 165   | 409.42 | 3.96  | 0.01   | 0.01 | 4     | 0.01234352 | 0.01 | 4          | 3.91  |
| famciclovir                | 33   | 250 | 103   | 321.33 | 0.08  | 286.58 | 100  | 0.01  | 73.48882   | 33   | 0.03030303 | -0.05 |
| famotidine                 | 0.1  | 40  | 163.5 | 337.45 | 0.58  | 23.96  | 10   | 0.02  | 24.4050349 | 10   | 0.016      | -1.1  |
| fenofibrate                | 0.01 | 267 | 80.5  | 360.84 | 5.23  | 0      | 0.01 | 106.8 | 0.00058423 | 0.01 | 106.8      | 3.41  |
| fexofenadine hydrochloride | 1    | 180 | 196   | 501.65 | 1.96  | 0.71   | 0.1  | 7.2   | 1.51241444 | 1    | 0.72       | 5.53  |
| finasteride                | 0.1  | 5   | 253   | 372.54 | 3.01  | 0.01   | 0.01 | 2     | 0.10010204 | 0.1  | 0.2        | 3.91  |
| fluconazole                | 1    | 200 | 139   | 306.27 | -0.44 | 398.11 | 100  | 0.01  | 231.939362 | 100  | 0.008      | 0.57  |
| flurbiprofen               | 0.01 | 40  | 110.5 | 244.26 | 3.75  | 0.04   | 0.01 | 16    | 0.01194325 | 0.01 | 16         | 2.61  |
| furosemide                 | 0.01 | 40  | 206   | 330.75 | 1.9   | 0.43   | 0.1  | 1.6   | 1.14490606 | 1    | 0.16       | 0.7   |

|                         |       |     |       |        |       |        |      |      |            |      |       |       |
|-------------------------|-------|-----|-------|--------|-------|--------|------|------|------------|------|-------|-------|
| gabapentin              | 100   | 800 | 164   | 171.24 | -0.66 | 208.93 | 100  | 0.03 | 215.216329 | 100  | 0.032 | 0.9   |
| gliclazide              | 0.01  | 80  | 181   | 323.42 | 1.09  | 4.76   | 1    | 0.32 | 7.22831171 | 1    | 0.32  | 1.31  |
| glimepiride             | 0.01  | 4   | 207   | 490.62 | 3.96  | 0.01   | 0.01 | 1.6  | 0.0147916  | 0.01 | 1.6   | 2.22  |
| glipizide               | 0.01  | 10  | 208.5 | 445.54 | 2.57  | 0.12   | 0.1  | 0.4  | 0.32972866 | 0.1  | 0.4   | 1.67  |
| glyburide               | 0.01  | 6   | 169.5 | 494.01 | 4.24  | 0.01   | 0.01 | 2.4  | 0.00781638 | 0.01 | 2.4   | 2.99  |
| griseofulvin            | 0.01  | 250 | 220   | 352.77 | 2.05  | 0.23   | 0.1  | 10   | 0.86449333 | 0.1  | 10    | 2.03  |
| haloperidol             | 0.01  | 5   | 148.7 | 375.87 | 3.85  | 0.02   | 0.01 | 2    | 0.01459848 | 0.01 | 2     | 4.37  |
| hydrochlorothiazide     | 0.01  | 100 | 274   | 297.74 | -0.36 | 14.83  | 10   | 0.04 | 187.545731 | 100  | 0.004 | -0.34 |
| ibuprofen               | 0.01  | 600 | 76    | 206.28 | 3.68  | 0.09   | 0.01 | 240  | 0.01185024 | 0.01 | 240   | 2.19  |
| imatinib mesylate       | 0.049 | 400 | 212   | 493.6  | 4.53  | 0      | 0.01 | 160  | 0.00400539 | 0.01 | 160   | 4.29  |
| imidapril hydrochloride | 33    | 10  | 139.5 | 405.44 | 1.53  | 5.58   | 1    | 0.04 | 3.29000527 | 1    | 0.04  | 1.11  |
| indapamide              | 0.01  | 2.5 | 161   | 365.84 | 2.96  | 0.11   | 0.1  | 0.1  | 0.11029636 | 0.1  | 0.1   | 2.24  |
| indinavir sulfate       | 0.015 | 400 | 153.5 | 613.79 | 3.68  | 0.04   | 0.01 | 160  | 0.03526061 | 0.01 | 160   | 2.2   |
| irbesartan              | 0.01  | 300 | 180.5 | 428.53 | 6.04  | 0      | 0.01 | 120  | 0.00010746 | 0.01 | 120   | 3.64  |
| isoniazid               | 100   | 300 | 171.4 | 137.14 | -0.67 | 144.65 | 100  | 0.01 | 176.37383  | 100  | 0.012 | 0.04  |
| isotretinoin            | 0.01  | 40  | 174.5 | 300.43 | 6.74  | 0      | 0.01 | 16   | 1.5032E-05 | 0.01 | 16    | 3.86  |
| itraconazole            | 0.01  | 100 | 166.2 | 705.65 | 5.99  | 0      | 0.01 | 40   | 0.00019855 | 0.01 | 40    | 5.36  |
| ketoprofen              | 0.01  | 50  | 94    | 254.28 | 2.76  | 0.58   | 0.1  | 2    | 0.12150166 | 0.1  | 2     | 2.5   |
| ketotifen fumarate      | 1     | 1   | 152.5 | 309.43 | 3.59  | 0.03   | 0.01 | 0.4  | 0.02186918 | 0.01 | 0.4   | 3.84  |

|                             |      |       |       |        |       |         |      |       |            |      |            |       |
|-----------------------------|------|-------|-------|--------|-------|---------|------|-------|------------|------|------------|-------|
| lamivudine                  | 33   | 300   | 161   | 229.26 | -1.46 | 1889.85 | 1000 | 0     | 1818.01846 | 1000 | 0.0012     | -0.35 |
| l-<br>carbocysteine         | 0.1  | 500   | 205.5 | 179.2  | -2.61 | 7566.38 | 1000 | 0     | 20072.8022 | 1000 | 0.002      | -0.9  |
| letrozole                   | 0.01 | 2.5   | 182   | 285.3  | 1.43  | 1.88    | 1    | 0.01  | 2.91455175 | 1    | 0.01       | 2.49  |
| levamisole<br>hydrochloride | 33   | 150   | 60.7  | 204.3  | 1.84  | 8.3     | 1    | 0.6   | 0.81196698 | 0.1  | 6          | 2.05  |
| levetiracetam               | 1040 | 750   | 117   | 170.21 | -0.34 | 290.19  | 100  | 0.03  | 102.389417 | 100  | 0.03       | 0.35  |
| levodopa                    | 1    | 500   | 285   | 197.19 | -2.82 | 2204.88 | 1000 | 0     | 35822.4172 | 1000 | 0.002      | 0.03  |
| levonorgestrel              | 0.01 | 0.75  | 236   | 312.44 | 3.5   | 0.01    | 0.01 | 0.3   | 0.02716668 | 0.01 | 0.3        | 4.1   |
| levosulpiride               | 0.01 | 25    | 186   | 341.43 | 1.11  | 4.28    | 1    | 0.1   | 7.28738439 | 1    | 0.1        | 0.85  |
| limaprost<br>alfadex        | 100  | 0.005 | 98.5  | 380.52 | 3.44  | 0.16    | 0.1  | 0     | 0.03798809 | 0.01 | 0.002      | 2.95  |
| linezolid                   | 1    | 600   | 182   | 337.35 | 0.17  | 40.39   | 33   | 0.07  | 62.7120091 | 33   | 0.07272727 | 0.96  |
| lopinavir                   | 0.01 | 133.3 | 125.5 | 628.8  | 6.09  | 0       | 0.01 | 53.32 | 0.00014053 | 0.01 | 53.32      | 5.3   |
| loratadine                  | 0.01 | 10    | 135   | 382.89 | 5.05  | 0       | 0.01 | 4     | 0.0009383  | 0.01 | 4          | 4.4   |
| lorazepam                   | 0.08 | 5     | 167   | 321.16 | 2.37  | 0.34    | 0.1  | 0.2   | 0.37669638 | 0.1  | 0.2        | 3.41  |
| losartan<br>potassium       | 100  | 100   | 184   | 422.92 | 3.85  | 0.01    | 0.01 | 40    | 0.01642586 | 0.01 | 40         | 3.59  |
| loxoprofen<br>sodium        | 1000 | 60    | 109.7 | 246.3  | 1.97  | 2.43    | 1    | 0.24  | 0.72566205 | 0.1  | 2.4        | 2.23  |
| manidipine<br>hydrochloride | 0.01 | 20    | 126.5 | 610.7  | 7.02  | 0       | 0.01 | 8     | 1.6036E-05 | 0.01 | 8          | 4.86  |

|                                 |      |     |       |        |       |        |      |      |            |      |       |       |
|---------------------------------|------|-----|-------|--------|-------|--------|------|------|------------|------|-------|-------|
| mebendazole<br>(chewable)       | 0.01 | 500 | 288.5 | 295.29 | 3.08  | 0      | 0.01 | 200  | 0.06753342 | 0.01 | 200   | 1.56  |
| medroxyprogesterone<br>acetate  | 0.01 | 10  | 221.7 | 344.49 | 3.66  | 0.01   | 0.01 | 4    | 0.02072271 | 0.01 | 4     | 3.87  |
| metoclopramide<br>hydrochloride | 0.01 | 10  | 147.2 | 299.8  | 2.23  | 0.69   | 0.1  | 0.4  | 0.48540207 | 0.1  | 0.4   | 2.12  |
| metronidazole                   | 1    | 500 | 159   | 171.15 | -0.46 | 147.66 | 100  | 0.02 | 135.720954 | 100  | 0.02  | -0.89 |
| mirtazapine                     | 1    | 45  | 115   | 265.35 | 2.81  | 0.34   | 0.1  | 1.8  | 0.11300277 | 0.1  | 1.8   | 3.12  |
| modafinil                       | 0.01 | 200 | 165   | 273.36 | 0.94  | 8.19   | 1    | 0.8  | 8.62988415 | 1    | 0.8   | 2.43  |
| morphine<br>sulfate             | 33   | 10  | 197   | 285.34 | 0.57  | 9.66   | 1    | 0.04 | 21.1170212 | 10   | 0.004 | 2.4   |
| mosapride<br>citrate            | 0.01 | 5   | 152   | 421.9  | 3.44  | 0.05   | 0.01 | 2    | 0.04211914 | 0.01 | 2     | 3.27  |
| nabumetone                      | 0.01 | 500 | 80    | 228.29 | 2.98  | 0.43   | 0.1  | 20   | 0.06572898 | 0.01 | 200   | 2.7   |
| nalidixic<br>acid               | 0.01 | 500 | 229.5 | 232.23 | 1.02  | 1.33   | 1    | 2    | 6.09801267 | 1    | 2     | 0.9   |
| nevirapine                      | 0.01 | 200 | 248   | 266.3  | 2.65  | 0.02   | 0.01 | 80   | 0.16392348 | 0.1  | 8     | 1.89  |
| nicergoline                     | 0.01 | 30  | 137   | 484.39 | 4.07  | 0.02   | 0.01 | 12   | 0.01133614 | 0.01 | 12    | 3.17  |
| niclosamide<br>(chewable)       | 0.01 | 500 | 227.5 | 327.12 | 4.34  | 0      | 0.01 | 200  | 0.00411128 | 0.01 | 200   | 2.01  |
| nicorandil                      | 10   | 5   | 92.5  | 211.17 | 0.75  | 51.15  | 33   | 0    | 10.3252891 | 10   | 0.002 | -0.85 |

|                                           |      |      |       |        |       |        |      |      |            |      |            |       |
|-------------------------------------------|------|------|-------|--------|-------|--------|------|------|------------|------|------------|-------|
| nicotinami<br>de                          | 100  | 50   | 129.5 | 122.12 | -0.21 | 116.07 | 100  | 0    | 54.4573866 | 33   | 0.00606061 | 0.36  |
| nifedipine                                | 0.01 | 10   | 173   | 346.33 | 3.12  | 0.06   | 0.01 | 4    | 0.07223707 | 0.01 | 4          | 0.73  |
| nifurtimox                                | 33   | 250  | 181   | 287.3  | 0.02  | 49.71  | 33   | 0.03 | 75.4406855 | 33   | 0.03030303 | -0.79 |
| nilvadipine                               | 0.01 | 4    | 149   | 385.37 | 3.04  | 0.13   | 0.1  | 0.16 | 0.09663799 | 0.01 | 1.6        | 0.87  |
| nimesulide                                | 0.01 | 100  | 143.7 | 308.31 | 3.21  | 0.08   | 0.01 | 40   | 0.05227062 | 0.01 | 40         | 0.28  |
| nizatidine                                | 10   | 150  | 131   | 331.46 | -0.16 | 271.35 | 100  | 0.01 | 131.734985 | 100  | 0.006      | 0.43  |
| norethindr<br>one<br>(norethiste<br>rone) | 0.01 | 1    | 203.5 | 298.42 | 2.97  | 0.03   | 0.01 | 0.4  | 0.08792207 | 0.01 | 0.4        | 3.87  |
| norgestima<br>te                          | 0.01 | 0.25 | 216   | 369.5  | 5.06  | 0      | 0.01 | 0.1  | 0.00088488 | 0.01 | 0.1        | 3.81  |
| olanzapine                                | 0.01 | 20   | 195   | 312.44 | 3.01  | 0.04   | 0.01 | 8    | 0.08395308 | 0.01 | 8          | 2.85  |
| olopatadin<br>e<br>hydrochlori<br>de      | 10   | 5    | 188.7 | 337.41 | 1.09  | 4.17   | 1    | 0.02 | 7.54098279 | 1    | 0.02       | 3.36  |
| ondansetr<br>on<br>hydrochlori<br>de      | 10   | 24   | 231.5 | 293.36 | 2.72  | 0.03   | 0.01 | 9.6  | 0.15369895 | 0.1  | 0.96       | 2.92  |
| orlistat                                  | 0.01 | 120  | 43    | 495.73 | 8.61  | 0      | 0.01 | 48   | 3.3459E-07 | 0.01 | 48         | 4.25  |
| oxycodone                                 | 0.01 | 30   | 220   | 315.36 | -0.04 | 25.75  | 10   | 0.01 | 95.0772489 | 33   | 0.00363636 | 2.19  |
| hydrochlori<br>de<br>penicillami<br>ne    | 100  | 250  | 204   | 149.21 | -1.73 | 859.41 | 100  | 0.01 | 2203.27106 | 1000 | 0.001      | -0.01 |

|                               |      |       |       |        |      |      |      |      |            |      |      |      |
|-------------------------------|------|-------|-------|--------|------|------|------|------|------------|------|------|------|
| pergolide mesylate            | 0.01 | 0.25  | 207.5 | 314.5  | 4.4  | 0    | 0.01 | 0.1  | 0.00344263 | 0.01 | 0.1  | 3.94 |
| phenobarbital                 | 0.1  | 100   | 176   | 232.23 | 1.37 | 2.01 | 1    | 0.4  | 2.7238822  | 1    | 0.4  | 0.9  |
| phenytoin (chewable)          | 0.01 | 50    | 296.5 | 252.27 | 2.08 | 0.03 | 0.01 | 20   | 0.57694659 | 0.1  | 2    | 2.09 |
| phenytoin sodium              | 0.01 | 100   | 296.5 | 252.27 | 2.08 | 0.03 | 0.01 | 40   | 0.57694659 | 0.1  | 4    | 2.09 |
| pioglitazone hydrochloride    | 0.01 | 45    | 183.5 | 356.45 | 3.53 | 0.02 | 0.01 | 18   | 0.02892468 | 0.01 | 18   | 2.62 |
| pranlukast hydrate            | 0.01 | 112.5 | 244.5 | 481.5  | 5.06 | 0    | 0.01 | 45   | 0.0011531  | 0.01 | 45   | 3.13 |
| praziquantel                  | 0.1  | 600   | 137   | 312.41 | 3.36 | 0.07 | 0.01 | 240  | 0.03749686 | 0.01 | 240  | 3    |
| promethazine hydrochloride    | 100  | 25    | 60    | 284.43 | 4.4  | 0.03 | 0.01 | 10   | 0.00311348 | 0.01 | 10   | 3.48 |
| propranolol hydrochloride     | 33   | 90    | 96    | 259.34 | 2.75 | 0.58 | 0.1  | 3.6  | 0.12680591 | 0.1  | 3.6  | 2.6  |
| pseudoephedrine hydrochloride | 10   | 60    | 118.3 | 165.23 | 0.89 | 16.1 | 10   | 0.02 | 5.85273557 | 1    | 0.24 | 1.61 |
| pyrantel embonate             | 0.01 | 250   | 178.5 | 206.31 | 3.03 | 0.04 | 0.01 | 100  | 0.05294077 | 0.01 | 100  | 2.04 |

|                                 |      |     |       |        |       |           |      |      |            |      |         |       |
|---------------------------------|------|-----|-------|--------|-------|-----------|------|------|------------|------|---------|-------|
| pyrazinami<br>de                | 10   | 400 | 190   | 123.11 | -0.68 | 86.95     | 33   | 0.05 | 162.018024 | 100  | 0.016   | -0.2  |
| pyridostig<br>mine<br>bromide   | 100  | 60  | 153   | 181.12 | -4.26 | 1130489.2 | 1000 | 0    | 906225.773 | 1000 | 0.00024 | 0.33  |
| pyridoxine<br>hydrochlori<br>de | 100  | 25  | 160   | 169.64 | -0.35 | 111.05    | 100  | 0    | 104.423504 | 100  | 0.001   | 0.23  |
| pyrimetha<br>mine               | 0.01 | 25  | 233.5 | 248.72 | 3     | 0.01      | 0.01 | 10   | 0.06838813 | 0.01 | 10      | 2.27  |
| raloxifene<br>hydrochlori<br>de | 0.1  | 60  | 145   | 473.59 | 6.86  | 0         | 0.01 | 24   | 1.7975E-05 | 0.01 | 24      | 4.66  |
| ramipril                        | 10   | 10  | 109   | 416.51 | 1.54  | 11.23     | 10   | 0    | 3.30290006 | 1    | 0.04    | 2.58  |
| ranitidine<br>hydrochlori<br>de | 100  | 300 | 69.5  | 314.41 | 0.67  | 154.68    | 100  | 0.01 | 18.4827398 | 10   | 0.12    | 0.49  |
| ribavirin                       | 33   | 200 | 181   | 244.2  | -2.85 | 31321.72  | 1000 | 0    | 47535.2366 | 1000 | 0.0008  | -1.62 |
| rizatriptan<br>benzoate         | 33   | 10  | 120.5 | 269.34 | 1.18  | 12.8      | 10   | 0    | 4.89295088 | 1    | 0.04    | 2.01  |
| rosiglitazo<br>ne maleate       | 1000 | 8   | 154   | 357.43 | 3.02  | 0.11      | 0.1  | 0.32 | 0.09385578 | 0.01 | 3.2     | 2.06  |
| sildenafil<br>citrate           | 1    | 100 | 188   | 474.59 | 1.98  | 0.77      | 0.1  | 4    | 1.36643376 | 1    | 0.4     | 1.58  |
| simvastatin                     | 0.01 | 80  | 136.5 | 418.56 | 4.48  | 0.01      | 0.01 | 32   | 0.0038109  | 0.01 | 32      | 3.67  |
| spironolact<br>one              | 0.01 | 25  | 134.5 | 416.58 | 2.84  | 0.31      | 0.1  | 1    | 0.16556496 | 0.1  | 1       | 3.96  |
| stavudine                       | 83   | 40  | 165.5 | 224.21 | -0.49 | 178.73    | 100  | 0    | 190.513159 | 100  | 0.0016  | -0.05 |

|                               |      |     |       |        |       |          |      |      |            |      |            |       |
|-------------------------------|------|-----|-------|--------|-------|----------|------|------|------------|------|------------|-------|
| sulfadiazine                  | 0.01 | 500 | 254   | 250.28 | 0.1   | 6.82     | 1    | 2    | 54.6633378 | 33   | 0.06060606 | 0.28  |
| sulfamethoxazole              | 0.01 | 400 | 167   | 253.28 | 0.56  | 17.39    | 10   | 0.16 | 19.1809846 | 10   | 0.16       | 0.14  |
| sultamicillin tosilate        | 0.1  | 375 | 190   | 594.66 | 1.74  | 1.6      | 1    | 1.5  | 2.97535456 | 1    | 1.5        | 0.74  |
| sumatriptan succinate         | 100  | 100 | 170   | 295.41 | 0.74  | 12.51    | 10   | 0.04 | 14.7807065 | 10   | 0.04       | 1.52  |
| tacrolimus                    | 0.01 | 5   | 128   | 804.02 | 5.78  | 0        | 0.01 | 2    | 0.00036689 | 0.01 | 2          | 4.69  |
| taltirelin hydrate            | 33   | 5   | 73.5  | 405.41 | -1.42 | 22399.82 | 1000 | 0    | 2932.00331 | 1000 | 0.00002    | -0.42 |
| tamoxifen citrate             | 0.01 | 20  | 97    | 371.51 | 6.82  | 0        | 0.01 | 8    | 1.5461E-05 | 0.01 | 8          | 5.46  |
| tegafur                       | 10   | 200 | 164.5 | 200.17 | -0.07 | 62.07    | 33   | 0.02 | 64.6649564 | 33   | 0.02424242 | -0.17 |
| telmisartan                   | 0.01 | 80  | 262   | 514.62 | 7.29  | 0        | 0.01 | 32   | 7.257E-06  | 0.01 | 32         | 5.78  |
| temocapril hydrochloride      | 0.1  | 4   | 168   | 476.62 | 2.1   | 0.92     | 0.1  | 0.16 | 1.0409797  | 1    | 0.016      | 2.94  |
| tenofovir disoproxil fumarate | 13.4 | 300 | 279   | 287.21 | 0.8   | 0.88     | 0.1  | 12   | 12.5161153 | 10   | 0.12       | -2.37 |
| terazosin hydrochloride       | 100  | 5   | 273.3 | 387.43 | 2.18  | 0.06     | 0.01 | 2    | 0.70382266 | 0.1  | 0.2        | 1.14  |
| terbinafine hydrochloride     | 1    | 250 | 120.5 | 291.43 | 5.96  | 0        | 0.01 | 100  | 8.7863E-05 | 0.01 | 100        | 4.71  |
| theophylline                  | 1    | 300 | 272   | 180.16 | -0.03 | 4.39     | 1    | 1.2  | 53.0796894 | 33   | 0.03636364 | -0.49 |

|                                        |      |     |       |        |       |          |      |      |            |      |            |       |
|----------------------------------------|------|-----|-------|--------|-------|----------|------|------|------------|------|------------|-------|
| topiramate                             | 9.8  | 200 | 125.5 | 339.36 | 0.04  | 198.71   | 100  | 0.01 | 85.1002138 | 33   | 0.02424242 | -1.05 |
| toremifene<br>citrate                  | 0.63 | 60  | 109   | 405.97 | 6.53  | 0        | 0.01 | 24   | 3.2943E-05 | 0.01 | 24         | 6.12  |
| triflusal                              | 0.01 | 300 | 121   | 248.16 | 2.06  | 1.54     | 1    | 1.2  | 0.5942946  | 0.1  | 12         | 0.31  |
| trimebutin<br>maleate                  | 1    | 200 | 79    | 387.47 | 4.26  | 0.04     | 0.01 | 80   | 0.00585475 | 0.01 | 80         | 2.44  |
| trimethopr<br>im                       | 0.1  | 200 | 201   | 290.32 | 0.98  | 3.49     | 1    | 0.8  | 8.35885815 | 1    | 0.8        | 0.72  |
| tulobuterol<br>hydrochlori<br>de       | 100  | 1   | 90    | 227.74 | 2.53  | 0.97     | 0.1  | 0.04 | 0.18480313 | 0.1  | 0.04       | 2.73  |
| ursodeoxyc<br>holic acid<br>(ursodiol) | 0.01 | 100 | 203   | 392.57 | 4.51  | 0        | 0.01 | 40   | 0.0033357  | 0.01 | 40         | 3.87  |
| valsartan                              | 0.01 | 320 | 116.5 | 435.52 | 4.86  | 0        | 0.01 | 128  | 0.00165302 | 0.01 | 128        | 2.8   |
| voglibose                              | 1000 | 0.3 | 162.5 | 267.28 | -2.35 | 16527.85 | 1000 | 0    | 16452.6729 | 1000 | 0.0000012  | -1.14 |
| warfarin<br>sodium                     | 0.01 | 10  | 161   | 308.33 | 2.9   | 0.11     | 0.1  | 0.4  | 0.10672982 | 0.1  | 0.4        | 2.78  |
| zaltoprofe<br>n                        | 0.01 | 80  | 131   | 298.36 | 3.5   | 0.05     | 0.01 | 32   | 0.02594243 | 0.01 | 32         | 2.79  |
| zidovudine                             | 10   | 300 | 109   | 267.24 | 0.04  | 227.93   | 100  | 0.01 | 67.0149138 | 33   | 0.03636364 | -1    |
| zolmitripta<br>n                       | 20   | 5   | 140   | 287.36 | 1.29  | 6.8      | 1    | 0.02 | 4.05225078 | 1    | 0.02       | 1.97  |
| zolpidem<br>tartrate                   | 10   | 10  | 196   | 307.39 | 3.03  | 0.04     | 0.01 | 4    | 0.0788787  | 0.01 | 4          | 3.15  |

| <b>in silico<br/>solubility<br/>(mg/mL)<br/>based on<br/>KLogP</b> | <b>lowest<br/>solubility<br/>(KLogP)</b> | <b>in silico<br/>dose<br/>number,<br/>KlogP</b> | <b>in silico<br/>solubility<br/>(mg/mL)<br/>based on<br/>KLogP and<br/>average<br/>melting<br/>point</b> | <b>lowest<br/>solubility,<br/>KLogP and<br/>average<br/>melting<br/>point</b> | <b>in silico dose<br/>number,KLogP<br/>and average<br/>melting point</b> |
|--------------------------------------------------------------------|------------------------------------------|-------------------------------------------------|----------------------------------------------------------------------------------------------------------|-------------------------------------------------------------------------------|--------------------------------------------------------------------------|
| 7.62                                                               | 1                                        | 1.2                                             | 8.05632269                                                                                               | 1                                                                             | 1.2                                                                      |
| 0.12                                                               | 0.1                                      | 4                                               | 0.08679732                                                                                               | 0.01                                                                          | 40                                                                       |
| 7.11                                                               | 1                                        | 4                                               | 8.29290868                                                                                               | 1                                                                             | 4                                                                        |
| 78.1                                                               | 33                                       | 0.1                                             | 663.496118                                                                                               | 100                                                                           | 0.032                                                                    |
| 2.22                                                               | 1                                        | 1.6                                             | 6.3543733                                                                                                | 1                                                                             | 1.6                                                                      |
| 34.03                                                              | 33                                       | 0.01                                            | 7.23482321                                                                                               | 1                                                                             | 0.4                                                                      |
| 0.01                                                               | 0.01                                     | 0.8                                             | 0.02684758                                                                                               | 0.01                                                                          | 0.8                                                                      |
| 40.49                                                              | 33                                       | 0                                               | 240.048295                                                                                               | 100                                                                           | 0.0002                                                                   |
| 1.85                                                               | 1                                        | 0                                               | 0.29287729                                                                                               | 0.1                                                                           | 0.04                                                                     |
| 4.91                                                               | 1                                        | 0.4                                             | 3.42536137                                                                                               | 1                                                                             | 0.4                                                                      |
| 0.99                                                               | 0.1                                      | 0.04                                            | 0.33168322                                                                                               | 0.1                                                                           | 0.04                                                                     |

|       |      |      |            |      |             |
|-------|------|------|------------|------|-------------|
| 0.83  | 0.1  | 24   | 0.27148149 | 0.1  | 24          |
| 2     | 1    | 0.01 | 0.13398506 | 0.1  | 0.08        |
| 0.23  | 0.1  | 1.6  | 0.16486842 | 0.1  | 1.6         |
| 21.83 | 10   | 0.04 | 39.3242762 | 33   | 0.012121212 |
| 1.06  | 1    | 0.6  | 2.05646859 | 1    | 0.6         |
| 0.02  | 0.01 | 0.8  | 0.00504281 | 0.01 | 0.8         |
| 0.11  | 0.1  | 0.2  | 0.06565172 | 0.01 | 2           |
| 0.06  | 0.01 | 0.1  | 0.17556398 | 0.1  | 0.01        |
| 0.1   | 0.01 | 1.6  | 0.02477559 | 0.01 | 1.6         |
| 0.22  | 0.1  | 0.64 | 0.34927429 | 0.1  | 0.64        |
| 457.7 | 100  | 0.02 | 156.598519 | 100  | 0.02        |
| 72.68 | 33   | 0    | 18.8933835 | 10   | 0.01        |
| 0.1   | 0.01 | 160  | 0.18736073 | 0.1  | 16          |
| 0.16  | 0.1  | 1    | 0.05349319 | 0.01 | 10          |
| 1.2   | 1    | 1.6  | 1.07306966 | 1    | 1.6         |

|        |      |      |            |      |       |
|--------|------|------|------------|------|-------|
| 0.07   | 0.01 | 4    | 0.02183272 | 0.01 | 4     |
| 10.38  | 10   | 0.1  | 7.91857949 | 1    | 1     |
| 0.05   | 0.01 | 60   | 0.00920995 | 0.01 | 60    |
| 4.94   | 1    | 0.01 | 1.07133793 | 1    | 0.01  |
| 0.57   | 0.1  | 4    | 0.53313528 | 0.1  | 4     |
| 34.03  | 33   | 0.02 | 21.4423958 | 10   | 0.08  |
| 0.09   | 0.01 | 200  | 0.35739014 | 0.1  | 20    |
| 0      | 0.01 | 40   | 3.5852E-05 | 0.01 | 40    |
| 0.4    | 0.1  | 0.01 | 0.19106741 | 0.1  | 0.012 |
| 0.01   | 0.01 | 40   | 0.01752233 | 0.01 | 40    |
| 0.23   | 0.1  | 1.2  | 0.18856617 | 0.1  | 1.2   |
| 257.69 | 100  | 0    | 16.8297193 | 10   | 0.01  |
| 0      | 0.01 | 40   | 0.00064476 | 0.01 | 40    |
| 0      | 0.01 | 40   | 0.00283921 | 0.01 | 40    |
| 2.06   | 1    | 0.4  | 2.78140486 | 1    | 0.4   |
| 0      | 0.01 | 2    | 0.00219681 | 0.01 | 2     |

|        |      |      |            |      |       |
|--------|------|------|------------|------|-------|
| 0.02   | 0.01 | 0.2  | 0.24158246 | 0.1  | 0.02  |
| 0.07   | 0.01 | 2    | 0.02908933 | 0.01 | 2     |
| 0.03   | 0.01 | 10   | 0.02759191 | 0.01 | 10    |
| 204.8  | 100  | 0.01 | 200.726656 | 100  | 0.008 |
| 86.61  | 33   | 0.01 | 6.29151892 | 1    | 0.4   |
| 0.27   | 0.1  | 20   | 0.36193811 | 0.1  | 20    |
| 0.01   | 0.01 | 4    | 0.04252047 | 0.01 | 4     |
| 255.74 | 100  | 0.01 | 468.317523 | 100  | 0.008 |
| 0.78   | 0.1  | 24   | 0.46614075 | 0.1  | 24    |
| 0.25   | 0.1  | 2    | 0.80094909 | 0.1  | 2     |
| 0.03   | 0.01 | 8    | 0.08629978 | 0.01 | 8     |
| 0.01   | 0.01 | 240  | 0.08854584 | 0.01 | 240   |
| 0.19   | 0.1  | 0.01 | 0.18267855 | 0.1  | 0.008 |

|         |      |       |            |      |         |
|---------|------|-------|------------|------|---------|
| 1.07    | 1    | 1     | 0.59555068 | 0.1  | 10      |
| 86.89   | 33   | 0.05  | 15.8328692 | 10   | 0.16    |
| 0.02    | 0.01 | 0.4   | 0.01074356 | 0.01 | 0.4     |
| 132.53  | 100  | 0.01  | 14.0932908 | 10   | 0.1     |
| 0.04    | 0.01 | 0.4   | 0.02782109 | 0.01 | 0.4     |
| 0.01    | 0.01 | 4     | 0.01384966 | 0.01 | 4       |
| 389.31  | 100  | 0.01  | 99.1336905 | 100  | 0.01    |
| 1151.36 | 1000 | 0     | 1168.09841 | 1000 | 0.00016 |
| 0.25    | 0.1  | 10.68 | 0.03859977 | 0.01 | 106.8   |
| 0       | 0.01 | 72    | 0.00040707 | 0.01 | 72      |
| 0       | 0.01 | 2     | 0.0126021  | 0.01 | 2       |
| 38.52   | 33   | 0.02  | 22.6659778 | 10   | 0.08    |
| 0.54    | 0.1  | 1.6   | 0.16486268 | 0.1  | 1.6     |
| 6.79    | 1    | 0.16  | 18.1455382 | 10   | 0.016   |

|       |      |      |            |      |             |
|-------|------|------|------------|------|-------------|
| 5.81  | 1    | 3.2  | 5.92754991 | 1    | 3.2         |
| 2.87  | 1    | 0.32 | 4.35548851 | 1    | 0.32        |
| 0.3   | 0.1  | 0.16 | 0.81285906 | 0.1  | 0.16        |
| 0.93  | 0.1  | 0.4  | 2.61912786 | 1    | 0.04        |
| 0.12  | 0.1  | 0.24 | 0.1389971  | 0.1  | 0.24        |
| 0.25  | 0.1  | 10   | 0.90523564 | 0.1  | 10          |
| 0.01  | 0.01 | 2    | 0.00440867 | 0.01 | 2           |
| 14.17 | 10   | 0.04 | 179.104783 | 100  | 0.004       |
| 2.64  | 1    | 2.4  | 0.36620741 | 0.1  | 24          |
| 0     | 0.01 | 160  | 0.00696058 | 0.01 | 160         |
| 14.69 | 10   | 0    | 8.65359555 | 1    | 0.04        |
| 0.6   | 0.1  | 0.1  | 0.57884354 | 0.1  | 0.1         |
| 1.31  | 1    | 1.6  | 1.06485337 | 1    | 1.6         |
| 0.02  | 0.01 | 120  | 0.026993   | 0.01 | 120         |
| 28.2  | 10   | 0.12 | 34.3901559 | 33   | 0.036363636 |
| 0.01  | 0.01 | 16   | 0.01140285 | 0.01 | 16          |
| 0     | 0.01 | 40   | 0.00084695 | 0.01 | 40          |
| 1.06  | 1    | 0.2  | 0.22109667 | 0.1  | 2           |
| 0.02  | 0.01 | 0.4  | 0.01229794 | 0.01 | 0.4         |

|        |      |       |            |      |             |
|--------|------|-------|------------|------|-------------|
| 146.7  | 100  | 0.01  | 141.123159 | 100  | 0.012       |
| 147.53 | 100  | 0.02  | 391.38845  | 100  | 0.02        |
| 0.16   | 0.1  | 0.1   | 0.25384685 | 0.1  | 0.1         |
| 5.12   | 1    | 0.6   | 0.50065478 | 0.1  | 6           |
| 59.25  | 33   | 0.09  | 20.9052359 | 10   | 0.3         |
| 3.11   | 1    | 2     | 50.6005092 | 33   | 0.060606061 |
| 0      | 0.01 | 0.3   | 0.00682396 | 0.01 | 0.3         |
| 7.8    | 1    | 0.1   | 13.2608596 | 10   | 0.01        |
| 0.51   | 0.1  | 0     | 0.11739443 | 0.1  | 0.0002      |
| 6.55   | 1    | 2.4   | 10.170697  | 10   | 0.24        |
| 0      | 0.01 | 53.32 | 0.00086653 | 0.01 | 53.32       |
| 0.01   | 0.01 | 4     | 0.00419125 | 0.01 | 4           |
| 0.03   | 0.01 | 2     | 0.03435512 | 0.01 | 2           |
| 0.02   | 0.01 | 40    | 0.02989016 | 0.01 | 40          |
| 1.33   | 1    | 0.24  | 0.39878096 | 0.1  | 2.4         |
| 0.01   | 0.01 | 8     | 0.00231792 | 0.01 | 8           |

|         |      |      |            |      |        |
|---------|------|------|------------|------|--------|
| 0.13    | 0.1  | 20   | 2.23624169 | 1    | 2      |
| 0       | 0.01 | 4    | 0.01277752 | 0.01 | 4      |
| 0.89    | 0.1  | 0.4  | 0.62531901 | 0.1  | 0.4    |
| 397.44  | 100  | 0.02 | 365.297671 | 100  | 0.02   |
| 0.16    | 0.1  | 1.8  | 0.05534636 | 0.01 | 18     |
| 0.26    | 0.1  | 8    | 0.27925758 | 0.1  | 8      |
| 0.14    | 0.1  | 0.4  | 0.31234363 | 0.1  | 0.4    |
| 0.08    | 0.01 | 2    | 0.06229878 | 0.01 | 2      |
| 0.83    | 0.1  | 20   | 0.12524399 | 0.1  | 20     |
| 1.75    | 1    | 2    | 8.03874629 | 1    | 2      |
| 0.13    | 0.1  | 8    | 0.94328117 | 0.1  | 8      |
| 0.16    | 0.1  | 1.2  | 0.09004615 | 0.01 | 12     |
| 0.2     | 0.1  | 20   | 0.87897616 | 0.1  | 20     |
| 2036.49 | 1000 | 0    | 411.057162 | 100  | 0.0002 |

|        |      |      |            |      |             |
|--------|------|------|------------|------|-------------|
| 31.24  | 10   | 0.02 | 14.6573951 | 10   | 0.02        |
| 14.02  | 10   | 0    | 17.7320976 | 10   | 0.004       |
| 320.95 | 100  | 0.01 | 487.085976 | 100  | 0.01        |
| 19.53  | 10   | 0    | 14.2938066 | 10   | 0.0016      |
| 68.61  | 33   | 0.01 | 44.4895088 | 33   | 0.012121212 |
| 69.75  | 33   | 0.02 | 33.861105  | 33   | 0.018181818 |
| 0      | 0.01 | 0.4  | 0.01106873 | 0.01 | 0.4         |
| 0      | 0.01 | 0.1  | 0.01573564 | 0.01 | 0.1         |
| 0.06   | 0.01 | 8    | 0.12134912 | 0.1  | 0.8         |
| 0.02   | 0.01 | 2    | 0.04049748 | 0.01 | 2           |
| 0.02   | 0.01 | 9.6  | 0.09697748 | 0.01 | 9.6         |
| 0.12   | 0.1  | 4.8  | 0.00766505 | 0.01 | 48          |
| 0.15   | 0.1  | 1.2  | 0.55985635 | 0.1  | 1.2         |
| 16.38  | 10   | 0.1  | 41.9824646 | 33   | 0.03030303  |

|      |      |      |            |      |      |
|------|------|------|------------|------|------|
| 0    | 0.01 | 0.1  | 0.00992866 | 0.01 | 0.1  |
| 5.94 | 1    | 0.4  | 8.03874629 | 1    | 0.4  |
| 0.03 | 0.01 | 20   | 0.56381368 | 0.1  | 2    |
| 0.03 | 0.01 | 40   | 0.56381368 | 0.1  | 4    |
| 0.15 | 0.1  | 1.8  | 0.23510866 | 0.1  | 1.8  |
| 0.02 | 0.01 | 45   | 0.09814457 | 0.01 | 45   |
| 0.15 | 0.1  | 24   | 0.08590035 | 0.01 | 240  |
| 0.27 | 0.1  | 1    | 0.02589676 | 0.01 | 10   |
| 0.82 | 0.1  | 3.6  | 0.17911811 | 0.1  | 3.6  |
| 3.07 | 1    | 0.24 | 1.11521577 | 1    | 0.24 |
| 0.36 | 0.1  | 10   | 0.51735694 | 0.1  | 10   |

|         |      |      |            |      |             |
|---------|------|------|------------|------|-------------|
| 28.79   | 10   | 0.16 | 53.64921   | 33   | 0.048484848 |
| 29.06   | 10   | 0.02 | 23.2935891 | 10   | 0.024       |
| 29.21   | 10   | 0.01 | 27.4661801 | 10   | 0.01        |
| 0.07    | 0.01 | 10   | 0.36726599 | 0.1  | 1           |
| 0       | 0.01 | 24   | 0.00284887 | 0.01 | 24          |
| 1.02    | 1    | 0.04 | 0.30122807 | 0.1  | 0.4         |
| 234.12  | 100  | 0.01 | 27.9747588 | 10   | 0.12        |
| 1844.36 | 1000 | 0    | 2799.08225 | 1000 | 0.0008      |
| 1.89    | 1    | 0.04 | 0.72372047 | 0.1  | 0.4         |
| 1.04    | 1    | 0.03 | 0.85597484 | 0.1  | 0.32        |
| 1.93    | 1    | 0.4  | 3.43232642 | 1    | 0.4         |
| 0.04    | 0.01 | 32   | 0.02460525 | 0.01 | 32          |
| 0.02    | 0.01 | 10   | 0.01255939 | 0.01 | 10          |
| 64.89   | 33   | 0    | 69.1711472 | 33   | 0.004848485 |

|         |      |      |            |      |             |
|---------|------|------|------------|------|-------------|
| 4.51    | 1    | 2    | 36.1157091 | 33   | 0.060606061 |
| 45.74   | 33   | 0.05 | 50.4511299 | 33   | 0.048484848 |
| 15.97   | 10   | 0.15 | 29.7535456 | 10   | 0.15        |
| 2.08    | 1    | 0.4  | 2.4529867  | 1    | 0.4         |
| 0.01    | 0.01 | 2    | 0.00451374 | 0.01 | 2           |
| 2239.98 | 1000 | 0    | 293.200331 | 100  | 0.0002      |
| 0       | 0.01 | 8    | 0.00035419 | 0.01 | 8           |
| 78.14   | 33   | 0.02 | 81.4083569 | 33   | 0.024242424 |
| 0       | 0.01 | 32   | 0.00023483 | 0.01 | 32          |
| 0.13    | 0.1  | 0.16 | 0.15046735 | 0.1  | 0.16        |
| 1306.47 | 1000 | 0    | 18512.6912 | 1000 | 0.0012      |
| 0.62    | 0.1  | 0.2  | 7.71726203 | 1    | 0.02        |
| 0       | 0.01 | 100  | 0.00156244 | 0.01 | 100         |
| 12.67   | 10   | 0.12 | 153.083497 | 100  | 0.012       |

|         |      |      |            |      |             |
|---------|------|------|------------|------|-------------|
| 2444.62 | 1000 | 0    | 1046.96135 | 1000 | 0.0008      |
| 0       | 0.01 | 24   | 8.4677E-05 | 0.01 | 24          |
| 86.46   | 33   | 0.04 | 33.419641  | 33   | 0.036363636 |
| 2.61    | 1    | 0.8  | 0.38681925 | 0.1  | 8           |
| 6.35    | 1    | 0.8  | 15.2106213 | 10   | 0.08        |
| 0.61    | 0.1  | 0.04 | 0.11660289 | 0.1  | 0.04        |
| 0.01    | 0.01 | 40   | 0.01456086 | 0.01 | 40          |
| 0.54    | 0.1  | 12.8 | 0.18979209 | 0.1  | 12.8        |
| 1019.1  | 1000 | 0    | 1014.46359 | 1000 | 0.0000012   |
| 0.15    | 0.1  | 0.4  | 0.14069731 | 0.1  | 0.4         |
| 0.27    | 0.1  | 3.2  | 0.13304869 | 0.1  | 3.2         |
| 2499.2  | 1000 | 0    | 734.803918 | 100  | 0.012       |
| 1.42    | 1    | 0.02 | 0.84663519 | 0.1  | 0.2         |
| 0.03    | 0.01 | 4    | 0.05983561 | 0.01 | 4           |
